# Supplementary material for: Interferon-driven brain phenotype in a mouse model of RNaseT2 deficient leukoencephalopathy
Source: PubMed Central journal article supplement (PMC8586222; doi:10.1038/s41467-021-26880-x), 2021-11-11
Supplement: 41467_2021_26880_MOESM5_ESM.pdf [file 41467_2021_26880_MOESM5_ESM.pdf]

## Reporting Summary

Nature Research wishes to improve the reproducibility of the work that we publish. This form provides structure for consistency and transparency in reporting. For further information on Nature Research policies, see [Authors & Referees](#) and the [Editorial Policy Checklist](#).

### Statistics

For all statistical analyses, confirm that the following items are present in the figure legend, table legend, main text, or Methods section.

n/a Confirmed

- The exact sample size ( $n$ ) for each experimental group/condition, given as a discrete number and unit of measurement
- A statement on whether measurements were taken from distinct samples or whether the same sample was measured repeatedly
- The statistical test(s) used AND whether they are one- or two-sided  
*Only common tests should be described solely by name; describe more complex techniques in the Methods section.*
- A description of all covariates tested
- A description of any assumptions or corrections, such as tests of normality and adjustment for multiple comparisons
- A full description of the statistical parameters including central tendency (e.g. means) or other basic estimates (e.g. regression coefficient) AND variation (e.g. standard deviation) or associated estimates of uncertainty (e.g. confidence intervals)
- For null hypothesis testing, the test statistic (e.g.  $F$ ,  $t$ ,  $r$ ) with confidence intervals, effect sizes, degrees of freedom and  $P$  value noted  
*Give  $P$  values as exact values whenever suitable.*
- For Bayesian analysis, information on the choice of priors and Markov chain Monte Carlo settings
- For hierarchical and complex designs, identification of the appropriate level for tests and full reporting of outcomes
- Estimates of effect sizes (e.g. Cohen's  $d$ , Pearson's  $r$ ), indicating how they were calculated

*Our web collection on [statistics for biologists](#) contains articles on many of the points above.*

### Software and code

Policy information about [availability of computer code](#)

#### Data collection

Behavioral testing: ANY-maze v5.1 (Stoelting Co.); FACS: BD FACSDiva Software v8.0.2 (BD Biosciences); qPCR: QuantStudio 3 Real-Time PCR System (Applied Biosystems); Microscopy: Axio Imager.M1 microscope (Zeiss) using 10x/0.3, 20x/0.5 and 40x/0.75 Plan-NEOFLUAR objectives and an Axiocam 105 color camera (Zeiss) or an Olympus BX51 light or combined light and fluorescent microscope; Ex vivo MRI: 300 MHz (7 T) vertical wide bore system, using a transmit/receive birdcage radiofrequency coil with an inner diameter of 25 mm and a 1 Tm-1 gradient insert (Bruker) interfaced to a Linux operating system running Topspin 2.0 and Para Vision 3.0 imaging software (Bruker Biospin); In vivo MRI: 94/30 BioSpec (Bruker BioSpin); Single nuclei RNA sequencing: 10X Chromium Next GEM Single Cell on Illumina NextSeq 550.

#### Data analysis

GraphPad Prism version 8.3.0 (GraphPad Software Inc, San Diego, CA); Ex vivo MRI: image sequence analysis (ISA) tool package (Paravision 5, Bruker) and OriginPro v. 8 (OriginLab); FACS: FlowJo™ Software Version 10.6.1 (Becton, Dickinson and Company, 2019); qPCR: QuantStudio™ Design & Analysis Software v1.4.3; In vivo MRI: Amira 6.2.0 (Thermo Fisher Scientific) for semiautomatic segmentation; Single nuclei RNA sequencing: CellRanger software v.4.0.0 (10XGenomics), SCANPY package v1.7.2 and ShinyGO v0.60; DAB-ISG15 signal analysis: Scikit-image v0.18.1 including automatic normalization (for details see public discussion on scikit-image developer page: <https://github.com/scikit-image/scikit-image/pull/4725>); Survival curves: open source python package lifelines (v0.26.0).

For manuscripts utilizing custom algorithms or software that are central to the research but not yet described in published literature, software must be made available to editors/reviewers. We strongly encourage code deposition in a community repository (e.g. GitHub). See the Nature Research [guidelines for submitting code & software](#) for further information.

## Data

Policy information about [availability of data](#)

All manuscripts must include a [data availability statement](#). This statement should provide the following information, where applicable:

- Accession codes, unique identifiers, or web links for publicly available datasets
- A list of figures that have associated raw data
- A description of any restrictions on data availability

Raw data for all results/figures presented in this article, including Supplementary figures, are available in the Source Data file.

Any additional data are available upon request. Source data are provided with this paper.

Raw single nuclei RNA sequencing data are accessible from the NCBI GEO database using the accession number GSE180138.

<https://www.ncbi.nlm.nih.gov/geo/query/acc.cgi?acc=GSE180138>

Detailed annotation tables for these datasets are provided in Supplementary Table 3-7.

Mus musculus reference genome (GRCm38.p6) use for single RNA nuclei study is accessible from NCBI GenBank under the accession numbers GCA\_000001635.8.

Reference Sequence for Rnaset2a and Rnaset2b gene are accessible from NCBI GenBank under the accession numbers NM\_001083938.3 and NM\_0266211.2 respectively.

## Field-specific reporting

Please select the one below that is the best fit for your research. If you are not sure, read the appropriate sections before making your selection.

- Life sciences       Behavioural & social sciences       Ecological, evolutionary & environmental sciences

For a reference copy of the document with all sections, see [nature.com/documents/nr-reporting-summary-flat.pdf](https://www.nature.com/documents/nr-reporting-summary-flat.pdf)

## Life sciences study design

All studies must disclose on these points even when the disclosure is negative.

|                 |                                                                                                                                                                                                                                                                                                                                                                                                                                                                                                                                                                                                                                                                                           |
|-----------------|-------------------------------------------------------------------------------------------------------------------------------------------------------------------------------------------------------------------------------------------------------------------------------------------------------------------------------------------------------------------------------------------------------------------------------------------------------------------------------------------------------------------------------------------------------------------------------------------------------------------------------------------------------------------------------------------|
| Sample size     | Sample size was predetermined according to the type of experiment based on common practice.<br>For most mouse experiments 4-8 mice were used and the same number of controls (FACS analysis, histology, bone marrow analysis, immunohistochemistry, MRI, RNA sequencing, qPCR).<br>Blood values (blood count and serum) was taken and analyzed from most animals, which were transcardially perfused for further analysis.<br>Organ weight was performed whenever the further processing of the animals allowed this.<br>Sample size for behavioral analysis was determined by a priori one-way anova (effect thickness: 0.4; Error first type: 0.05; Error second type: 0.2; power 80%). |
| Data exclusions | No replicates were excluded.                                                                                                                                                                                                                                                                                                                                                                                                                                                                                                                                                                                                                                                              |
| Replication     | All experiments were conducted in at least 3 biological replicates and the experimental findings could be confirmed thereby.                                                                                                                                                                                                                                                                                                                                                                                                                                                                                                                                                              |
| Randomization   | Randomization was not relevant to the study, because we determine in all experiments the differences between different genotypes.                                                                                                                                                                                                                                                                                                                                                                                                                                                                                                                                                         |
| Blinding        | For most examinations the investigators were blinded by using lab codes for each sample not providing the genotype of the animal.<br>For other experiments, the investigators were not blinded to group allocation as they performed both the experiment and analysis; blinding was not possible.                                                                                                                                                                                                                                                                                                                                                                                         |

## Reporting for specific materials, systems and methods

We require information from authors about some types of materials, experimental systems and methods used in many studies. Here, indicate whether each material, system or method listed is relevant to your study. If you are not sure if a list item applies to your research, read the appropriate section before selecting a response.

### Materials & experimental systems

| n/a                                 | Included in the study                                           |
|-------------------------------------|-----------------------------------------------------------------|
| <input type="checkbox"/>            | <input checked="" type="checkbox"/> Antibodies                  |
| <input checked="" type="checkbox"/> | <input type="checkbox"/> Eukaryotic cell lines                  |
| <input checked="" type="checkbox"/> | <input type="checkbox"/> Palaeontology                          |
| <input type="checkbox"/>            | <input checked="" type="checkbox"/> Animals and other organisms |
| <input checked="" type="checkbox"/> | <input type="checkbox"/> Human research participants            |
| <input checked="" type="checkbox"/> | <input type="checkbox"/> Clinical data                          |

### Methods

| n/a                                 | Included in the study                                      |
|-------------------------------------|------------------------------------------------------------|
| <input checked="" type="checkbox"/> | <input type="checkbox"/> ChIP-seq                          |
| <input type="checkbox"/>            | <input checked="" type="checkbox"/> Flow cytometry         |
| <input type="checkbox"/>            | <input checked="" type="checkbox"/> MRI-based neuroimaging |

## Antibodies used

## For immunohistochemistry:

anti-CD41, Abcam, Cat#ab134131, Lot#GR3259786-4, Clone#EPR4330  
 anti-CD3, Abcam, Cat#ab16669, Lot#GR3285725-6, Clone#SP7  
 anti-B220, BD Pharmingen, Cat#557390, Lot#8152600, Clone#RA3-6B2  
 anti-myelin basic protein, Abcam, Cat#ab7349, Lot#GR3221078-15, Clone#12  
 anti-CD3, DCS, Cat#CI597C01, Lot#W298, Clone#SP7  
 anti-Mac3, BD Pharmingen, Cat#553322, Lot#6022547, Clone#M3/84  
 anti-CD8a, Invitrogen, Cat#14-0808-82, Lot#04221B, Clone#4SM15  
 anti-GFAP, Synaptic Systems, Cat#173011, Lot#1-12, Clone#134B1  
 anti-Iba1, Merck/Millipore, Cat#MABN92, Lot#3712470, Clone#20A12.1  
 anti-NeuN, Abcam, Cat#ab177487, Lot#GR3275122-4, Clone#EPR12763  
 anti-TMEM119, Abcam, Cat#ab209064, Lot#GR3211941-16, Clone#28-3  
 anti-ISG15, kindly provided by Marco Prinz  
 anti-CD31, Dianova, Cat#DIA-310, Lot#201015/05, Clone#SZ31

## For FACS analysis:

BV605 anti-mouse c-kit, Biolegend, Cat#105847, Lot#B274670, Clone#2B8,  
 AF488 anti-mouse Ter119/erythroid cells, Biolegend, Cat#116215, Lot#B270111, Clone#TER-119  
 PE/Cy7 anti-mouse CD3ε, Biolegend, Cat#100320, Lot#B239868, Clone#145-2C11  
 PE/Cy5 anti-mouse CD4, Biolegend, Cat#100513, Lot#B256773, Clone#RM4-5  
 BV605 anti-mouse CD8α, Biolegend, Cat#100743, Lot#B279615, Clone#53-6.7  
 PerCP/Cy.5.5 anti-mouse/human CD11b, Biolegend, Cat#101228, Lot#B236435, Clone#M1/70  
 BV711 anti-mouse CD16/32, Biolegend, Cat#101337, Lot#B269751, Clone#93  
 BUV395 rat-anti-mouse CD19, BD, Cat#563557, Lot#8206694, Clone#1D3  
 PE/Cy7 anti-mouse CD34, Biolegend, Cat#128617, Lot#B277974, Clone#HM34  
 BV510 anti-mouse CD41, Biolegend, Cat#133923, Lot#B258166, Clone#MWRReg30,  
 APC anti-human/mouse CD44, eBioscience, Cat#17-0441-82, Lot#431247, Clone#IM7  
 BV785 anti-mouse/ human CD44, Biolegend, Cat#103041, Lot#B281256, Clone#IM7  
 APC/Cy7 anti-mouse CD45, Biolegend, Cat#103116, Lot#B324364, Clone#30F11  
 BV510 anti mouse CD45R/B220, Biolegend, Cat#103247, Lot#B313156, Clone#RA3-6B2  
 BUV395 rat anti mouse CD45R/B220, BD, Cat#563793, Lot#9028674, Clone#RA3-6B2  
 PE anti-mouse CD62L, Biolegend, Cat#104408, Lot#B322380, Clone#MEL-14  
 APC anti-mouse CD71, Biolegend, Cat#113819, Lot#B264912, Clone#RI7217  
 Pacific Blue anti-mouse CD105, Biolegend, Cat#120411, Lot#B245561, Clone#MJ7/18  
 PerCP Cy5.5 anti-mouse CD150, Biolegend, Cat#115921, Lot#B318999, Clone#TC15-12F12.2  
 BV421 anti-mouse TCRβ chain, Biolegend, Cat#109229, Lot#B264324, Clone#H57-597  
 FITC anti-mouse gamma delta TCR, eBioscience, Cat#11-5711-82, Lot#E00635-1198, Clone#eBioGL3  
 PE/Cy5 anti-mouse Ly-6A/6E (Sca-1), Biolegend, Cat#108109, Lot#B253864, Clone#D7  
 PE/Cy7 anti-mouse Ly-6C, Biolegend, Cat#128018, Lot#B200606, Clone#HK1.4  
 BV510 anti-mouse Ly6G, Biolegend, Cat#127633, Lot#B336186, Clone#1A8  
 AF700 anti-mouse Ly6G/Ly-6C (Gr-1), Biolegend, Cat#108421, Lot#B323270, Clone#RB6-8C5  
 APC anti-mouse CCR2, R&D, Cat#FAB5538A, Lot#ABLE0314121, Clone#475301  
 Biotin anti-mouse P2RY12; Biolegend, Part#95566, Lot#B263990, Clone#S16007D  
 PE anti-mouse αH2Kb/Db antibody, Biolegend, Cat#114607, Lot#B327570, Clone#28-8-6  
 PE mouse IgG2a isotype control, Biolegend, Cat#400213, Lot#B277922, Clone#MOPC-173

## For western blotting:

anti-mouse RNaseT2, Cloud-Clone Corp, Cat#RPA113Mu01, Lot#A20191010620  
 anti-mouse β-actin, Sigma, Cat#A5441, Lot#026M4780V

## Validation

anti-CD41, Abcam, Cat#ab134131, Lot#GR3259786-4, Clone#EPR4330, validation stated on supplier's website: <https://www.abcam.com/cd41-antibody-epr4330-ab134131.html>  
 anti-CD3, Abcam, Cat#ab16669, Lot#GR3285725-6, Clone#SP7, validation stated on supplier's website: <https://www.abcam.com/cd3-antibody-sp7-ab16669.html>  
 anti-B220, BD Pharmingen, Cat#557390, Lot#8152600, Clone#RA3-6B2, validation stated on supplier's website: <https://www.bdbiosciences.com/en-us/products/reagents/flow-cytometry-reagents/research-reagents/single-color-antibodies-ruo/apc-rat-anti-mouse-cd45r-b220.553092>  
 anti-myelin basic protein, Abcam, Cat#ab7349, Lot#GR3221078-15, Clone#12, validation stated on supplier's website: <https://www.abcam.com/myelin-basic-protein-antibody-12-ab7349.html>

anti-CD3, DCS, Cat#CI597C01, Lot#W298, Clone#SP7, validation stated on supplier's website: [http://s760772780.online.de/index.php?id=114&item\\_selectors=item\\_name%23clone%23isotype%23producer&item\\_specifire=CD3%23SP7%23Kaninchen%20lgG](http://s760772780.online.de/index.php?id=114&item_selectors=item_name%23clone%23isotype%23producer&item_specifire=CD3%23SP7%23Kaninchen%20lgG)

anti-Mac3, BD Pharmingen, Cat#553322, Lot#6022547, Clone#M3/84, validation stated on supplier's website: <https://www.bdbiosciences.com/en-us/products/reagents/flow-cytometry-reagents/research-reagents/single-color-antibodies-ruo/purified-rat-anti-mouse-cd107b.553322>

anti CD8a, Invitrogen, Cat#14-0808-82, Lot#04221B, Clone#4SM15, validation stated on supplier's website: <https://www.thermofisher.com/antibody/product/CD8a-Antibody-clone-4SM15-Monoclonal/14-0808-82>

anti-GFAP, Synaptic Systems, Cat#173011, Lot#1-12, Clone#134B1, validation stated on supplier's website: <https://www.ssys.com/product/173011>

anti-lba1, Merck/Millipore, Cat#MABN92, Lot#3712470, Clone#20A12.1, validation stated on supplier's website: [https://www.merckmillipore.com/DE/de/product/Anti-lba1-AIF1-Antibody,MM\\_NF-MABN92](https://www.merckmillipore.com/DE/de/product/Anti-lba1-AIF1-Antibody,MM_NF-MABN92)

anti-NeuN, Abcam, Cat#ab177487, Lot#GR3275122-4, Clone#EPR12763, validation stated on supplier's website: <https://www.abcam.com/neun-antibody-epr12763-neuronal-marker-ab177487.html>

anti-TMEM119, Abcam, Cat#ab209064, Lot#GR3211941-16, Clone#28-3, validation stated on supplier's website: <https://www.abcam.com/tmem119-antibody-28-3-microglial-marker-ab209064.html?productWallTab=ShowAll>

anti-ISG15, kindly provided by Marco Prinz, validation stated in Osiak, A.; Utermöhlen, O.; Niendorf, S.; Horak, I.; Knobeloch, K.-P. ISG15, an interferon-stimulated ubiquitin-like protein, is not essential for STAT1 signaling and responses against vesicular stomatitis and lymphocytic choriomeningitis virus. Molecular and cellular biology [Online] 2005, 25 (15), 6338-6345.

anti-CD31, Dianova, Cat#DIA-310, Lot#201015/05, Clone#SZ31, validation stated on supplier's website: <https://www.dianova.com/shop/dia-310-anti-cd31-mssw-aus-ratte-sz31-unkonj-fur-paraaffingewebe-aus-maus/>

BV605 anti-mouse c-kit, Biolegend, Cat#105847, Lot#B274670, Clone#2B8, validation stated on supplier's website: <https://www.biolegend.com/de-de/products/brilliant-violet-605-anti-mouse-cd117-c-kit-antibody-16969>

AF488 anti-mouse Ter119/erythroid cells, Biolegend, Cat#116215, Lot#B270111, Clone# TER-119, validation stated on supplier's website: <https://www.biolegend.com/de-de/products/alexa-fluor-488-anti-mouse-ter-119-erythroid-cells-antibody-2714>

PE/Cy7 anti-mouse CD3e, Biolegend, Cat#100320, Lot#B239868, Clone#145-2C11, validation stated on supplier's website: <https://www.biolegend.com/de-de/products/pe-cyanine7-anti-mouse-cd3epsilon-antibody-1899>

PE/Cy5 anti-mouse CD4, Biolegend, Cat#100513, Lot#B256773, Clone#RM4-5, validation stated on supplier's website: <https://www.biolegend.com/de-de/products/pe-cyanine5-anti-mouse-cd4-antibody-483>

BV605 anti-mouse CD8a, Biolegend, Cat#100743, Lot#B279615, Clone#53-6.7, validation stated on supplier's website: <https://www.biolegend.com/de-de/products/brilliant-violet-605-anti-mouse-cd8a-antibody-7636>

PerCP/Cy5.5 anti-mouse/human CD11b, Biolegend, Cat#101228, Lot#B236435, Clone# M1/70, validation stated on supplier's website: <https://www.biolegend.com/de-de/products/percp-cyanine5-5-anti-mouse-human-cd11b-antibody-4257>

BV711 anti-mouse CD16/32, Biolegend, Cat#101337, Lot#B269751, Clone#93, validation stated on supplier's website: <https://www.biolegend.com/de-de/products/brilliant-violet-711-anti-mouse-cd16-32-11835>

BUV395 rat-anti-mouse CD19, BD, Cat#563557, Lot#8206694, Clone#1D3, validation stated on supplier's website: <https://www.bdbiosciences.com/en-in/products/reagents/flow-cytometry-reagents/research-reagents/single-color-antibodies-ruo/buv395-rat-anti-mouse-cd19.563557>

PE/Cy7 anti-mouse CD34, Biolegend, Cat#128617, Lot#B277974, Clone#HM34, validation stated on supplier's website: <https://www.biolegend.com/de-de/products/pe-cyanine7-anti-mouse-cd34-antibody-15031>

BV510 anti-mouse CD41, Biolegend, Cat#133923, Lot#B258166, Clone#MWReg30, validation stated on supplier's website: <https://www.biolegend.com/de-de/products/brilliant-violet-510-anti-mouse-cd41-antibody-10072>

APC anti-human/mouse CD44, eBioscience, Cat#17-0441-82, Lot#431247, Clone#IM7, validation stated on supplier's website: <https://www.thermofisher.com/antibody/product/CD44-Antibody-clone-IM7-Monoclonal/17-0441-82>

BV785 anti-mouse/ human CD44, Biolegend, Cat#103041, Lot#B281256, Clone#IM7, validation stated on supplier's website: <https://www.biolegend.com/de-de/products/brilliant-violet-785-anti-mouse-human-cd44-antibody-7959>

APC/Cy7 anti-mouse CD45, Biolegend, Cat#103116, Lot#B324364, Clone#30F11, validation stated on supplier's website: <https://www.biolegend.com/de-de/products/apc-cyanine7-anti-mouse-cd45-antibody-2530>

BV510 anti mouse CD45R/B220, Biolegend, Cat#103247, Lot#B313156, Clone#RA3-6B2, validation stated on supplier's website: <https://www.biolegend.com/de-de/products/brilliant-violet-510-anti-mouse-human-cd45r-b220-antibody-7996>

BUV395 rat anti mouse CD45R/B220, BD, Cat#563793, Lot#9028674, Clone#RA3-6B2, validation stated on supplier's website: <https://www.bdbiosciences.com/en-eu/products/reagents/flow-cytometry-reagents/research-reagents/single-color-antibodies-ruo/buv395-rat-anti-mouse-cd45r-b220.563793>

PE anti-mouse CD62L, Biolegend, Cat#104408, Lot#B322380, Clone#MEL-14, validation stated on supplier's website: <https://www.biolegend.com/de-de/products/pe-anti-mouse-cd62l-antibody-386>

APC anti-mouse CD71, Biolegend, Cat#113819, Lot#B264912, Clone#RI7217, validation stated on supplier's website: <https://www.biolegend.com/de-de/products/apc-anti-mouse-cd71-antibody-15498>

Pacific Blue anti-mouse CD105, Biolegend, Cat#120411, Lot#B245561, Clone#MJ7/18, validation stated on supplier's website: <https://www.biolegend.com/de-de/products/pacific-blue-anti-mouse-cd105-antibody-6080>

PerCP Cy5.5 anti-mouse CD150, Biolegend, Cat#115921, Lot#B318999, Clone#TC15-12F12.2, validation stated on supplier's website: <https://www.biolegend.com/de-de/products/percp-cyanine5-5-anti-mouse-cd150-slam-antibody-4290>

BV421 anti-mouse TCRβ chain, Biolegend, Cat#109229, Lot#B264324, Clone#H57-597, validation stated on supplier's website: <https://www.biolegend.com/de-de/products/brilliant-violet-421-anti-mouse-tcr-beta-chain-antibody-7251>

FITC anti-mouse gamma delta TCR, eBioscience, Cat#11-5711-82, Lot#E00635-1198, Clone#eBioGL3, validation stated on supplier's website: <https://www.thermofisher.com/antibody/product/TCR-gamma-delta-Antibody-clone-eBioGL3-GL-3-GL3-Monoclonal/11-5711-82>

PE/Cy5 anti-mouse Ly-6A/6E (Sca-1), Biolegend, Cat#108109, Lot#B253864, Clone#D7, validation stated on supplier's website: <https://www.biolegend.com/de-de/products/pe-cyanine5-anti-mouse-ly-6a-e-sca-1-antibody-229>

PE/Cy7 anti-mouse Ly-6C, Biolegend, Cat#128018, Lot#B200606, Clone#HK1.4, validation stated on supplier's website: <https://www.biolegend.com/de-de/products/pe-cyanine7-anti-mouse-ly-6c-antibody-6063>

BV510 anti-mouse Ly6G, Biolegend, Cat#127633, Lot#B336186, Clone#1A8, validation stated on supplier's website: <https://www.biolegend.com/de-de/products/brilliant-violet-510-anti-mouse-ly-6g-antibody-9121>  
 AF700 anti-mouse Ly6G/Ly-6C (Gr-1), Biolegend, Cat#108421, Lot#B323270, Clone#RB6-8C5, validation stated on supplier's website: <https://www.biolegend.com/de-de/products/alexa-fluor-700-anti-mouse-ly-6g-ly-6c-gr-1-antibody-3390>  
 APC anti-mouse CCR2, R&D, Cat#FAB5538A, Lo#ABLE0314121, Clone#475301, validation stated on supplier's website: [https://www.rndsystems.com/products/mouse-ccr2-apc-conjugated-antibody-475301\\_fab5538a](https://www.rndsystems.com/products/mouse-ccr2-apc-conjugated-antibody-475301_fab5538a)  
 Biotin anti-mouse P2RY12; Biolegend, Part#95566, Lot#B263990, Clone#S16007D, validation stated on supplier's website: <https://www.biolegend.com/de-de/products/biotin-anti-p2ry12-antibody-16149>  
 PE anti-mouse  $\alpha$ H2Kb/Db antibody, Biolegend, Cat#114607, Lot#B327570, Clone#28-8-6; validation stated on supplier's website: <https://www.biolegend.com/de-de/products/pe-anti-mouse-h-2k-b-h-2d-b-antibody-1686>  
 PE mouse IgG2a isotype control, Biolegend, Cat#400213, Lot#B277922, Clone#MOPC-173; validation stated on supplier's website: <https://www.biolegend.com/de-de/products/pe-mouse-igg2a-kappa-isotype-ctrl-fc-3043>  
 anti-mouse RNaseT2, Cloud-Clone Corp, Cat#RPA113Mu01, Lot#A20191010620, validation stated on supplier's website: <http://www.cloud-clone.com/products/RPA113Mu01.html>  
 anti-mouse  $\beta$ -actin, Sigma-Aldrich, Cat#A5441, Lot#026M4780V, validation stated on supplier's website: <https://www.sigmaaldrich.com/DE/en/product/sigma/a5441>

## Animals and other organisms

Policy information about [studies involving animals](#); [ARRIVE guidelines](#) recommended for reporting animal research

|                         |                                                                                                                                                                                                                                                                                                                                                                                                                                                                                                                   |
|-------------------------|-------------------------------------------------------------------------------------------------------------------------------------------------------------------------------------------------------------------------------------------------------------------------------------------------------------------------------------------------------------------------------------------------------------------------------------------------------------------------------------------------------------------|
| Laboratory animals      | This study involved Rnaset2 <sup>-/-</sup> mice (mus musculus) bred on a C57BL/6N genetic background between 2 to 10 months of mixed gender. Heterozygous littermates and wildtype animals were used as controls.<br>Further animals used in this study are Ifnar1 <sup>-/-</sup> mice (mus musculus) crossbred with Rnaset2 <sup>-/-</sup> mice. 6 male und 1 female of double knockout mice Rnaset2 <sup>-/-</sup> Ifnar1 <sup>-/-</sup> with 11 weeks and 4-6 month are analyzed with littermates as controls. |
| Wild animals            | This study did not include wild animals.                                                                                                                                                                                                                                                                                                                                                                                                                                                                          |
| Field-collected samples | This study did not include field-collected samples.                                                                                                                                                                                                                                                                                                                                                                                                                                                               |
| Ethics oversight        | All experiments were performed in accordance with the German animal protection law and with the permission of the Lower Saxony Federal State Office for Consumer Protection and Food Safety (LAVES) under protocol No. 17-2697.                                                                                                                                                                                                                                                                                   |

Note that full information on the approval of the study protocol must also be provided in the manuscript.

## Flow Cytometry

### Plots

Confirm that:

- The axis labels state the marker and fluorochrome used (e.g. CD4-FITC).
- The axis scales are clearly visible. Include numbers along axes only for bottom left plot of group (a 'group' is an analysis of identical markers).
- All plots are contour plots with outliers or pseudocolor plots.
- A numerical value for number of cells or percentage (with statistics) is provided.

### Methodology

|                           |                                                                                                                                                                                                                                                                                                                                                                                                                                                                                                                                                                                                                                                                                                                                                                 |
|---------------------------|-----------------------------------------------------------------------------------------------------------------------------------------------------------------------------------------------------------------------------------------------------------------------------------------------------------------------------------------------------------------------------------------------------------------------------------------------------------------------------------------------------------------------------------------------------------------------------------------------------------------------------------------------------------------------------------------------------------------------------------------------------------------|
| Sample preparation        | For spleen: Single-cell suspensions were prepared by mashing spleen through a 70 $\mu$ m cell strainer (Greiner Bio-One). Cells were washed with FACS buffer (PBS +2 % FBS) and incubated for 15 min in Fc-blocking buffer and stained with corresponding anti-mouse antibodies for 30 minutes on ice protected from light.<br>For CNS: Brain and spinal cord were removed and dissociated with the gentle MACSTM dissociator. The tissue was digested for 35 min with 2,5 mg/ml collagenase D (Roche) and 1 mg/ml DNaseI (Roche) at 37°C. Mononuclear cells were isolated by Percoll gradient centrifugation (37 % / 70 %, GE Healthcare) removed from the interphase, washed and subsequently blocked with $\alpha$ CD16/32 (BioLegend, Clone 93) for 15 min. |
| Instrument                | BD LSRFortessa <sup>TM</sup> X-20 (BD Biosciences) or FACS Canto <sup>TM</sup> II (BD Biosciences)                                                                                                                                                                                                                                                                                                                                                                                                                                                                                                                                                                                                                                                              |
| Software                  | Data were collected with BD FACSDiva Software Version 8.0.1 and analyzed in FlowJo <sup>TM</sup> Software Version 10.6.1 (Becton, Dickinson and Company, 2019)                                                                                                                                                                                                                                                                                                                                                                                                                                                                                                                                                                                                  |
| Cell population abundance | As we use no cell-sorting in our study this is not relevant.                                                                                                                                                                                                                                                                                                                                                                                                                                                                                                                                                                                                                                                                                                    |
| Gating strategy           | Gating strategies are described in the manuscript. More detailed information will be provided upon request.                                                                                                                                                                                                                                                                                                                                                                                                                                                                                                                                                                                                                                                     |

Tick this box to confirm that a figure exemplifying the gating strategy is provided in the Supplementary Information.

## Magnetic resonance imaging

### Experimental design

|                                 |                                                     |
|---------------------------------|-----------------------------------------------------|
| Design type                     | No functional MRI (fMRI) data were acquired.        |
| Design specifications           | As we use structural MRI data this is not relevant. |
| Behavioral performance measures | As we use structural MRI data this is not relevant. |

### Acquisition

|                               |                                                                                                                                                                                                                                                                                                                                                                                                                                                                                                                                                                                                                                                                                                                                                                                                                                                                                                                                                                                                                                                                                                                                                                                                                                                                                                                                                                                                                                                                                                                                                    |
|-------------------------------|----------------------------------------------------------------------------------------------------------------------------------------------------------------------------------------------------------------------------------------------------------------------------------------------------------------------------------------------------------------------------------------------------------------------------------------------------------------------------------------------------------------------------------------------------------------------------------------------------------------------------------------------------------------------------------------------------------------------------------------------------------------------------------------------------------------------------------------------------------------------------------------------------------------------------------------------------------------------------------------------------------------------------------------------------------------------------------------------------------------------------------------------------------------------------------------------------------------------------------------------------------------------------------------------------------------------------------------------------------------------------------------------------------------------------------------------------------------------------------------------------------------------------------------------------|
| Imaging type(s)               | Ex-vivo: structural and relaxometry analysis<br>In-vivo: structural and perfusion analysis                                                                                                                                                                                                                                                                                                                                                                                                                                                                                                                                                                                                                                                                                                                                                                                                                                                                                                                                                                                                                                                                                                                                                                                                                                                                                                                                                                                                                                                         |
| Field strength                | Ex-vivo: 7.0 Tesla<br>In-vivo: 9.4 Tesla                                                                                                                                                                                                                                                                                                                                                                                                                                                                                                                                                                                                                                                                                                                                                                                                                                                                                                                                                                                                                                                                                                                                                                                                                                                                                                                                                                                                                                                                                                           |
| Sequence & imaging parameters | <p>Ex-vivo:</p> <p>Rapid acquisition T2-weighted MR images with relaxation enhancement (RARE) sequence. Effective echo time= 18.1 ms; repetition time= 5 s; flip angle= 90°; averages= 32 (for sagittal and axial) or 64 (for coronal); and RARE factor (echo train length)= 4; image slice thickness= 0.5 mm. The field of view was 2.5 × 2.5 cm<sup>2</sup>, with an image matrix of 256 × 256. This yields an effective in-plane resolution of approximately 97 μm.</p> <p>Multi-slice multi-echo (MSME) sequence for transverse relaxation time (T<sub>2</sub>) measurement based on the Carr-Purcell Meiboom-Gill (CPMG) sequence, where transverse magnetization of a 90° pulse is refocused by a train of 180° pulses generating a series of echoes. Nominal flip angles= 90° and 180°, and a train of 12 echoes with TEs ranging from 8.17 ms to 98 ms with 8.17 ms echo-spacing; TR= 2 s, slice thickness= 0.5 mm; number of slices 8 and a matrix size 256 x 256 pixels.</p> <p>In vivo:</p> <p>Multi-slice T2-weighted images* (RARE, TR/effective TE= 6843/55 ms, number of echoes 8) were obtained with a special resolution of 40 x 40 x 300 μm<sup>3</sup>.</p> <p>For dynamic contrast enhanced MRI (DCM) a 3D T1-weighted data set (FLASH, TR/TE= 18/3.4, flip angle= 8°, 100 μm isotropic spatial resolution) was acquired before (S0) and 20 minutes after (SC) intravenous injection (via tail vein catheter) of 0.3 mmol/Kg body weight Gd-DTPA (Magnevist®, Bayer Vital GmbH, diluted to 0.1 mM in physiological saline)</p> |
| Area of acquisition           | Whole brain scan                                                                                                                                                                                                                                                                                                                                                                                                                                                                                                                                                                                                                                                                                                                                                                                                                                                                                                                                                                                                                                                                                                                                                                                                                                                                                                                                                                                                                                                                                                                                   |
| Diffusion MRI                 | <input type="checkbox"/> Used <input checked="" type="checkbox"/> Not used                                                                                                                                                                                                                                                                                                                                                                                                                                                                                                                                                                                                                                                                                                                                                                                                                                                                                                                                                                                                                                                                                                                                                                                                                                                                                                                                                                                                                                                                         |

### Preprocessing

|                            |                                                                                                                                                                                                                                                                                                                                                      |
|----------------------------|------------------------------------------------------------------------------------------------------------------------------------------------------------------------------------------------------------------------------------------------------------------------------------------------------------------------------------------------------|
| Preprocessing software     | Ex-vivo: Linux operating system running Topspin 2.0 and Para Vision 3.0 imaging software (Bruker Biospin).<br>In-vivo: Software package Amira 6.2.0 (Thermo Fisher Scientific) for semiautomatic segmentation.                                                                                                                                       |
| Normalization              | Magnetic field homogeneity was optimized by shimming                                                                                                                                                                                                                                                                                                 |
| Normalization template     | Each session of measurements started with a multi-slice orthogonal gradient-echo sequence for position determination and selection of the desired region for subsequent experiments.                                                                                                                                                                 |
| Noise and artifact removal | Magnetic field homogeneity was optimized by shimming                                                                                                                                                                                                                                                                                                 |
| Volume censoring           | For measurement of brain areas, the desired region of interest was drawn on the image and areas were computed using an image sequence analysis (ISA) tool package (Paravision 5, Bruker). The data were exported to OriginPro v. 8 (OriginLab) for further analysis and percentage of specific area with respect to whole brain area was calculated. |

### Statistical modeling & inference

|                           |                                                                                                                                                                                                                                                                                                                                                                                                                                                                                                                                               |
|---------------------------|-----------------------------------------------------------------------------------------------------------------------------------------------------------------------------------------------------------------------------------------------------------------------------------------------------------------------------------------------------------------------------------------------------------------------------------------------------------------------------------------------------------------------------------------------|
| Model type and settings   | For calculation of T <sub>2</sub> relaxation time, regions of interest (ROIs) were drawn at desired locations within the brain using an image sequence analysis (ISA) tool package (Paravision 5, Bruker). Monoexponential fitting was then used to calculate T <sub>2</sub> using a monoexponential fit function $[y = A + C \cdot \exp(-t/T_2)]$ , where A= Absolute bias, C= signal intensity, T <sub>2</sub> = transverse relaxation time. Means and standard deviation for T <sub>2</sub> relaxation times for each ROI were calculated. |
| Effect(s) tested          | One-way ANOVA (Tukey's post-test) for comparison of mean between two groups was performed. Levene's test was performed for homogeneity of variance analysis.                                                                                                                                                                                                                                                                                                                                                                                  |
| Specify type of analysis: | <input type="checkbox"/> Whole brain <input type="checkbox"/> ROI-based <input checked="" type="checkbox"/> Both                                                                                                                                                                                                                                                                                                                                                                                                                              |
| Anatomical location(s)    | Regions of interest (ROIs) were drawn at desired locations within the brain using an image sequence analysis (ISA) tool package (Paravision 5, Bruker)                                                                                                                                                                                                                                                                                                                                                                                        |

Statistic type for inference  
(See [Eklund et al. 2016](#))

As we use structural, relaxometry and perfusion MRI data this is not relevant.

Correction

As we use structural, relaxometry and perfusion MRI data this is not relevant.

## Models & analysis

- | n/a                                 | Involvement in the study                                              |
|-------------------------------------|-----------------------------------------------------------------------|
| <input checked="" type="checkbox"/> | <input type="checkbox"/> Functional and/or effective connectivity     |
| <input checked="" type="checkbox"/> | <input type="checkbox"/> Graph analysis                               |
| <input checked="" type="checkbox"/> | <input type="checkbox"/> Multivariate modeling or predictive analysis |
